# Supplementary material for: Do Human iPSC-Derived Cardiomyocytes Cultured on PLA Scaffolds Induce Expression of CD28/CTLA-4 by T Lymphocytes?
Source: MDPI journal article supplement (doi:10.3390/jfb13010006), 2022-01-11
Supplement: s1 [file s1]

# Do Human iPSC-Derived Cardiomyocytes Cultured on PLA Scaffolds Induce Expression of CD28/CTLA-4 by T Lymphocytes?

David Sergeevichev, Victor Balashov, Victoria Kozyreva, Sophia Pavlova, Maria Vasiliyeva, Alexander Romanov and Elena Chepeleva

**Table S1.** Profile of CD28 and CTLA-4 expression on T-lymphocytes

| Group        | CD4 <sup>+</sup> /CD28 <sup>+</sup> | CD4 <sup>+</sup> /CD152 <sup>+</sup> | CD8 <sup>+</sup> /CD28 <sup>+</sup> | CD8 <sup>+</sup> /CD152 <sup>+</sup> |
|--------------|-------------------------------------|--------------------------------------|-------------------------------------|--------------------------------------|
| CM           | 58,72 ± 4,54                        | 0,04 ± 0,03                          | 17,21 ± 3,92                        | 0,02 ± 0,02                          |
| PLA scaffold | 61,35 ± 1,80                        | 0,27 ± 0,23                          | 17,87 ± 2,83                        | 0,15 ± 0,09                          |
| TEC          | 59,87 ± 3,80                        | 0,19 ± 0,13                          | 16,64 ± 3,60                        | 0,06 ± 0,05                          |
| conA         | 66,31 ± 1,56                        | 1,23 ± 0,55                          | 21,70 ± 5,33                        | 0,10 ± 0,05                          |
| neg control  | 55,48 ± 8,85                        | 0,06 ± 0,03                          | 16,85 ± 5,04                        | 0,03 ± 0,01                          |

CM – culture of hiPSC-derived cardiomyocytes; PLA scaffold - microfiber scaffold without CM; TEC - hiPSC-derived cardiomyocytes on PLA scaffold; conA – cell stimulation with concanavalin A; k- – intact cells in culture medium.
